# Supplementary material for: Regulating polymer adsorption on colloid by surface morphology
Source: Royal Society of Chemistry journal article supplement (doi:10.1039/c8sm01833b), 2018-01-01
Supplement: c8sm01833b1.pdf [file c8sm01833b1.pdf]

## Supporting Information

### Regulating Polymer Adsorption on Colloid by Surface Morphology

Chao Wang,<sup>†‡</sup> Feng Yan,<sup>†‡</sup> Xiaohui Meng,<sup>†</sup> Yan Qiao,<sup>†</sup> Dong Qiu<sup>†‡\*</sup>

<sup>†</sup>Beijing National Laboratory for Molecular Sciences, State Key Laboratory of Polymer Physics and Chemistry, CAS Research/Education Center for Excellence in Molecular Sciences, Institute of Chemistry, Chinese Academy of Sciences, Beijing 100190, China

<sup>‡</sup>University of Chinese Academy of Sciences, Beijing 100190, China

\* Correspondence author: [dqiu@iccas.ac.cn](mailto:dqiu@iccas.ac.cn)

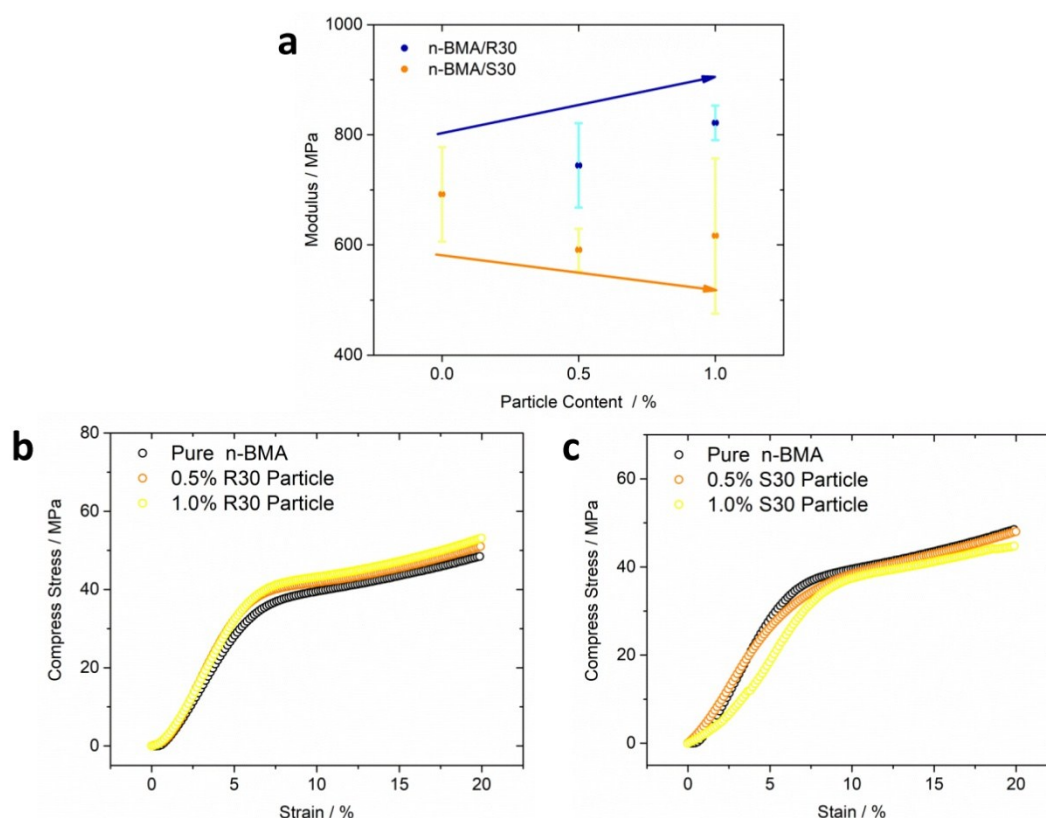

**Figure S1.** Compression measurements of PnBMA nanocomposites. (a) Compression modulus of PnBMA nanocomposite with two types of particles. (b, c) Compress stress-strain curves of PnBMA containing raspberry-like (b) and strawberry-like (c) particles with different weight percentages.
